# Supplementary material for: Beyond gait and balance: urinary and bowel dysfunction in X-linked adrenoleukodystrophy
Source: PubMed Central journal article supplement (PMC7789359; doi:10.1186/s13023-020-01596-1), 2021-01-06
Supplement: 13023_2020_1596_MOESM2_ESM.pdf [file 13023_2020_1596_MOESM2_ESM.pdf]

## URINARY AND BOWEL SYMPTOMS IN ALD/AMN

We are performing a study to better understand urinary and bowel symptoms in adults with ALD/AMN. We ask that you complete this *voluntary* survey in order to help us focus our efforts on symptoms that are most important to patients. If you have any questions about this survey, please contact Camille Corre at [ccorre@partners.org](mailto:ccorre@partners.org) or (617) 724-6374. When the survey is complete, please return to the following address:

Center for Rare Neurological Diseases  
Attn: Camille Corre  
175 Cambridge Street, Suite 340  
Boston, MA 02114

*Thank you in advance for your participation!*

---

Subject Code: \_\_\_\_\_

Date of Survey Completion: \_\_ / \_\_ / \_\_\_\_

### **ALD Symptoms:**

**1. Do you experience any of the following symptoms?**

- |                         |                             |                                                     |
|-------------------------|-----------------------------|-----------------------------------------------------|
| Difficulty walking      | <input type="checkbox"/> no | <input type="checkbox"/> yes, beginning at age ____ |
| Difficulty with balance | <input type="checkbox"/> no | <input type="checkbox"/> yes, beginning at age ____ |
| Leg numbness            | <input type="checkbox"/> no | <input type="checkbox"/> yes, beginning at age ____ |
| Leg weakness            | <input type="checkbox"/> no | <input type="checkbox"/> yes, beginning at age ____ |

**2. Do you use any of the following assistive devices?**

- |                   |                             |                                                     |
|-------------------|-----------------------------|-----------------------------------------------------|
| Foot/leg braces   | <input type="checkbox"/> no | <input type="checkbox"/> yes, beginning at age ____ |
| Cane              | <input type="checkbox"/> no | <input type="checkbox"/> yes, beginning at age ____ |
| Crutches          | <input type="checkbox"/> no | <input type="checkbox"/> yes, beginning at age ____ |
| Manual wheelchair | <input type="checkbox"/> no | <input type="checkbox"/> yes, beginning at age ____ |
| Power wheelchair  | <input type="checkbox"/> no | <input type="checkbox"/> yes, beginning at age ____ |
| Electric scooter  | <input type="checkbox"/> no | <input type="checkbox"/> yes, beginning at age ____ |

**3. Do you use a wheelchair or scooter full-time?**     no     yes, beginning at age \_\_\_\_

**4. Have you ever been diagnosed with a cerebral (brain) lesion based on an MRI?**  
 no     yes, at age \_\_\_\_

**5. Have you ever received a stem cell or bone marrow transplant as treatment for ALD?**     no     yes, at age \_\_\_\_

## **Urinary and Bowel Symptoms:**

6. Do you feel as though you urinate more frequently than the average person?

no  yes, beginning at age \_\_\_\_

If yes, approximately how many times do you urinate in a 24-hour period? \_\_\_\_

7. Do you ever feel a sudden, urgent, compelling desire to urinate, which is difficult to ignore?

no  yes, beginning at age \_\_\_\_

If yes, approximately how frequently does this sensation occur, on average?

- |                                                            |                                       |
|------------------------------------------------------------|---------------------------------------|
| <input type="checkbox"/> multiple times daily              | <input type="checkbox"/> once daily   |
| <input type="checkbox"/> several times a week              | <input type="checkbox"/> once a week  |
| <input type="checkbox"/> several times a month             | <input type="checkbox"/> once a month |
| <input type="checkbox"/> less frequently than once a month |                                       |

If yes, when this sensation occurs, approximately how much time do you have to reach the restroom before you have an accident? \_\_\_\_\_

8. Do you ever have difficulty initiating a urine stream even when you feel an urge to urinate?

no  yes, beginning at age \_\_\_\_

9. Do you ever have urinary accidents or involuntary leakage of urine?

no  yes, beginning at age \_\_\_\_

If yes, how often does this occur?

- |                                                            |                                       |
|------------------------------------------------------------|---------------------------------------|
| <input type="checkbox"/> multiple times daily              | <input type="checkbox"/> once daily   |
| <input type="checkbox"/> several times a week              | <input type="checkbox"/> once a week  |
| <input type="checkbox"/> several times a month             | <input type="checkbox"/> once a month |
| <input type="checkbox"/> less frequently than once a month |                                       |

10. Do you ever have a sensation that you are unable to completely empty your bladder?

no  yes, beginning at age \_\_\_\_

If yes, how often does this occur?

- |                                                            |                                       |
|------------------------------------------------------------|---------------------------------------|
| <input type="checkbox"/> multiple times daily              | <input type="checkbox"/> once daily   |
| <input type="checkbox"/> several times a week              | <input type="checkbox"/> once a week  |
| <input type="checkbox"/> several times a month             | <input type="checkbox"/> once a month |
| <input type="checkbox"/> less frequently than once a month |                                       |

**11. Do you ever feel a sudden, urgent, compelling desire to defecate, which is difficult to ignore?**

no  yes, beginning at age \_\_\_\_

**If yes, approximately how frequently does this sensation occur, on average?**

- |                                                            |                                       |
|------------------------------------------------------------|---------------------------------------|
| <input type="checkbox"/> multiple times daily              | <input type="checkbox"/> once daily   |
| <input type="checkbox"/> several times a week              | <input type="checkbox"/> once a week  |
| <input type="checkbox"/> several times a month             | <input type="checkbox"/> once a month |
| <input type="checkbox"/> less frequently than once a month |                                       |

**If yes, when this sensation occurs, approximately how much time do you have to reach the restroom before you have an accident? \_\_\_\_\_**

**12. Do you ever have bowel accidents or involuntary leakage of feces?**

no  yes, beginning at age \_\_\_\_

**If yes, how often does this occur?**

- |                                                            |                                       |
|------------------------------------------------------------|---------------------------------------|
| <input type="checkbox"/> multiple times daily              | <input type="checkbox"/> once daily   |
| <input type="checkbox"/> several times a week              | <input type="checkbox"/> once a week  |
| <input type="checkbox"/> several times a month             | <input type="checkbox"/> once a month |
| <input type="checkbox"/> less frequently than once a month |                                       |

**13. Do you experience constipation?**

no  yes, beginning at age \_\_\_\_

**If yes, how often does this occur?**

- |                                                            |                                       |
|------------------------------------------------------------|---------------------------------------|
| <input type="checkbox"/> multiple times daily              | <input type="checkbox"/> once daily   |
| <input type="checkbox"/> several times a week              | <input type="checkbox"/> once a week  |
| <input type="checkbox"/> several times a month             | <input type="checkbox"/> once a month |
| <input type="checkbox"/> less frequently than once a month |                                       |

**14. Do you experience diarrhea?**

no  yes, beginning at age \_\_\_\_

**If yes, how often does this occur?**

- |                                                            |                                       |
|------------------------------------------------------------|---------------------------------------|
| <input type="checkbox"/> multiple times daily              | <input type="checkbox"/> once daily   |
| <input type="checkbox"/> several times a week              | <input type="checkbox"/> once a week  |
| <input type="checkbox"/> several times a month             | <input type="checkbox"/> once a month |
| <input type="checkbox"/> less frequently than once a month |                                       |

**15. Have you ever had a urinary tract infection (UTI)?**  no  yes, beginning at age \_\_\_\_

**If yes, approximately how many UTIs have you had in the last year? \_\_\_\_\_**

**If yes, approximately how many UTIs have you had in your lifetime? \_\_\_\_\_**

**If yes, do you think your frequency of UTIs has increased in the last five years?**

no  yes

## **Symptom Management:**

16. Have you ever seen a urologist?  no  yes, beginning at age \_\_\_\_\_

If yes, what is his/her name? \_\_\_\_\_

If yes, how frequently do you see him/her?

- only once                       inconsistently (< 1x/year)  
 once a year                       more frequently than once a year

17. In order to manage your symptoms, have you ever tried...

...limiting your liquid intake during the day?

If yes, was this helpful?  yes  no

...limiting your liquid intake at night or before bed?

If yes, was this helpful?  yes  no

...limiting your food intake during the day?

If yes, was this helpful?  yes  no

...limiting your food intake at night or before bed?

If yes, was this helpful?  yes  no

...restricting your caffeine intake?

If yes, was this helpful?  yes  no

...restricting your alcohol intake?

If yes, was this helpful?  yes  no

...using a urinary catheter?

If yes, was this helpful?  yes  no

If yes, please indicate type and frequency of use: \_\_\_\_\_

If yes, beginning at age \_\_\_\_\_

...using Depends or other protective pads to prevent leakage?

If yes, was this helpful?  yes  no

...pelvic floor physical therapy?

If yes, was this helpful?  yes  no

...using a bladder massage technique?

If yes, was this helpful?  yes  no

...adhering to a strict bathroom schedule?

If yes, was this helpful?  yes  no

18. Are there any other interventions you have found helpful for managing your symptoms?  no  yes: \_\_\_\_\_

## Quality of Life

19. To what extent is your lifestyle limited because of your urinary/bowel symptoms (i.e. do you plan travel around the availability of restrooms, avoid eating/drinking in public spaces, change your work schedule to account for restroom needs, etc.)? Please circle.

No limitation      Minor limitations      Moderate limitations      Severe limitations

20. Which urinary/bowel symptom is the most bothersome to you? \_\_\_\_\_

## Medications

If you have ever tried any medications (over-the-counter or prescription) to manage your urinary and/or bowel symptoms (including but not limited to antibiotics for UTIs, probiotics, laxatives, Botox injections, etc.), please describe them below.

| Medication Name | Age Started Taking | Currently Taking? | Age Stopped Taking | What symptoms did this medication improve? | What side effects did you experience? |
|-----------------|--------------------|-------------------|--------------------|--------------------------------------------|---------------------------------------|
|                 |                    |                   |                    |                                            |                                       |
|                 |                    |                   |                    |                                            |                                       |
|                 |                    |                   |                    |                                            |                                       |
|                 |                    |                   |                    |                                            |                                       |
|                 |                    |                   |                    |                                            |                                       |

If needed, continue on next page.
